# Supplementary material for: Flexible wire-like all-carbon supercapacitors based on porous core–shell carbon fibers
Source: Royal Society of Chemistry journal article supplement (doi:10.1039/c3ta15280d), 2014-01-01
Supplement: c3ta15280d1.pdf [file c3ta15280d1.pdf]

Electronic Supplementary Information

## Flexible Wire-like All-Carbon Supercapacitors Based on Porous Core-shell Carbon Fibers

Weijia Zhou<sup>a,\*</sup>, Kai Zhou<sup>a</sup>, Xiaojun Liu<sup>a</sup>, Renzong Hu<sup>b</sup>, Hong Liu<sup>c</sup>, and Shaowei Chen<sup>a,d,\*</sup>

<sup>a</sup> *New Energy Research Center, School of Environment and Energy, South China University of Technology, University Town, Guangzhou 510006, China*

<sup>b</sup> *New Energy Research Center, School of Materials Science and Engineering, South China University of Technology, University Town, Guangzhou 510006, China*

<sup>c</sup> *State Key Laboratory of Crystal Materials, Center of Bio & Micro/Nano Functional Materials, Shandong University, 27 South Shanda Road, Jinan 250100, China*

<sup>d</sup> *Department of Chemistry and Biochemistry, University of California, 1156 High Street, Santa Cruz, California 95064, United States*

\* *Corresponding authors. E-mail: eszhouwj@scut.edu.cn (W. J. Zhou), shaowei@ucsc.edu (S. W. Chen)*

### Calculations

Specific capacitance  $C_m$  (F/g) was calculated from the CV and charge-discharge curves by the equations (1) and (2), respectively, where  $I_1$  (A) is the response current,  $\Delta V$  (V) is the voltage window,  $v$  (V/s) is the scan rate,  $I_2$  (A) is the constant discharge current,  $\Delta t$  (s) is the discharging time and  $m$  (g) is the weight used for the capacitance calculations. For three-electrode cell,  $m$  is the weight of electrode, which is about 0.06 g. For the two-electrode cell, it is the weight of the entire device, which is about 0.2 g.

$$C_m = \frac{\int I_1 dV}{vm\Delta V} \quad (1)$$

$$C_m = \frac{I_2 \Delta t}{m\Delta V} \quad (2)$$

Length capacitance  $C_L$  (F/cm) was calculated from CV and charge-discharge curves by the equations (3) and (4), respectively. Compared with Specific capacitance  $C_m$  (F/g),  $m$  (g) was replaced into  $L$  (cm).

$$C_L = \frac{\int I_1 dV}{vL\Delta V} \quad (3)$$

$$C_L = \frac{I_2 \Delta t}{L\Delta V} \quad (4)$$

Energy density (E) and Power density (P) were calculated by equations (5) and (6), respectively.

$$E = \frac{1}{2}C_m(\Delta V)^2 \quad (5)$$

$$P = E/\Delta t \quad (6)$$

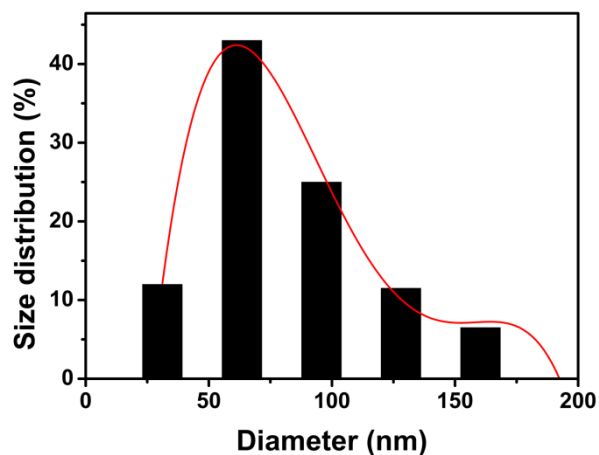

**Figure S1.** Size distribution of carbon nanoparticles from carbon shell.

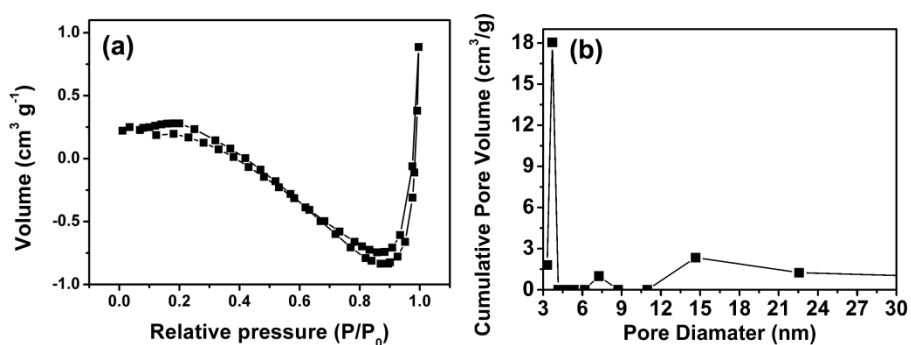

**Figure S2.** (a) specific surface area and (b) pore size distribution of the porous core-shell carbon fibers.

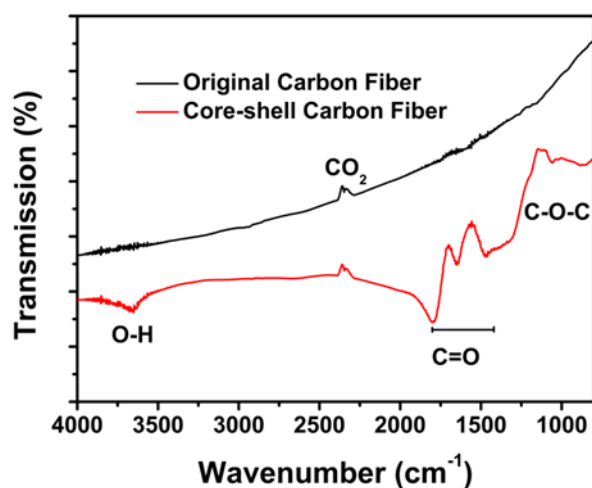

**Figure S3.** FT-IR spectra of the original carbon fibers and porous core-shell carbon fibers.

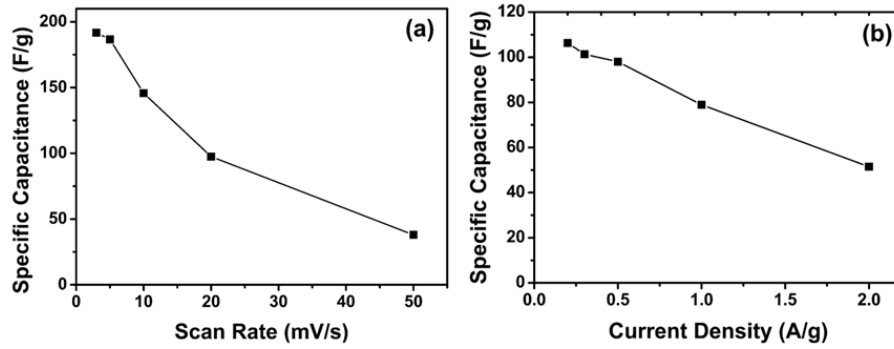

**Figure S4.** Calculated specific capacitance as a function of (a) scan rate and (b) current density for porous core-shell carbon fibers electrode.

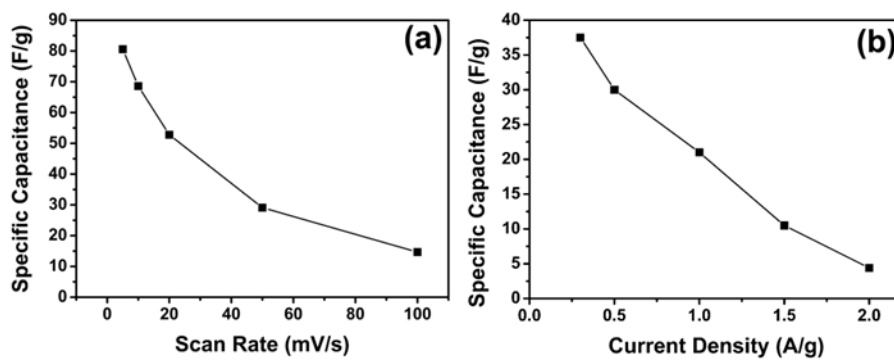

**Figure S5.** Calculated specific capacitance as a function of (a) scan rate and (b) current density for the wire-like all-carbon supercapacitor.

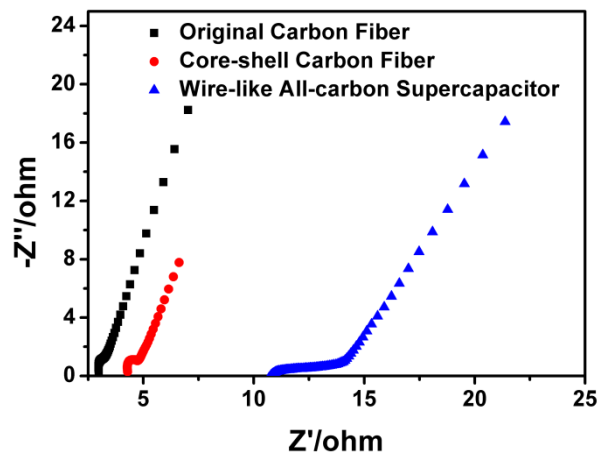

**Figure S6.** Impedance comparison curves for the original carbon fibers, porous core-shell carbon fibers and wire-like all-carbon supercapacitor.

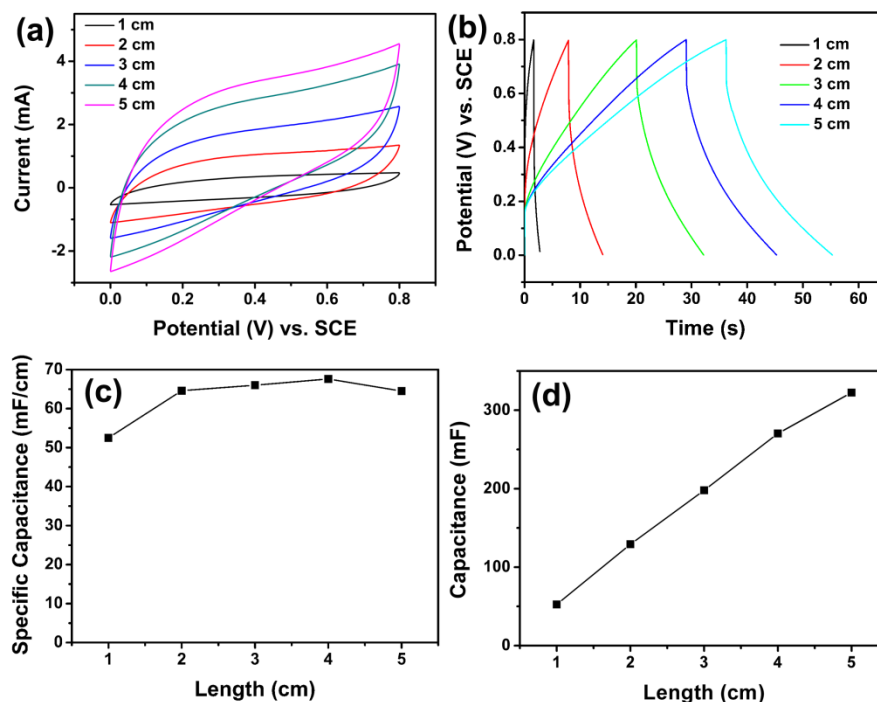

**Figure S7.** Length capacitance of wire-like all-carbon supercapacitor obtained from CV curves at a scan rate of 10 mV/s (a), galvanostatic charge/discharge curves at a constant current of 5 mA (b), and specific capacitance as a function of the length based on CV results (c,d). The diameters of wire-like all-carbon supercapacitor are about 0.53 mm,  $\text{H}_3\text{PO}_4/\text{PVA}$  as solid-state electrolyte. The supercapacitor fiber was cut off 1 cm every time to test the corresponding CV and galvanostatic charge/discharge result.

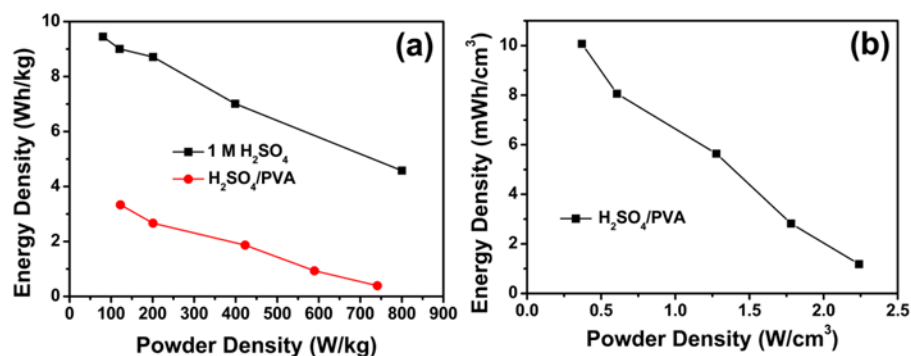

**Figure S8.** Ragone plot for the porous core-shell carbon fiber electrode in 1 M  $\text{H}_2\text{SO}_4$  aqueous electrolyte and  $\text{H}_2\text{SO}_4/\text{PVA}$  solid electrolyte, respectively. The data were calculated by (a) the weight and (b) volume of the supercapacitor.
